# Supplementary material for: Gaussian fluctuations of spatially inhomogeneous polymers
Source: Royal Society of Chemistry journal article supplement (doi:10.1039/c6sm02230h), 2017-01-01
Supplement: c6sm02230h1.pdf [file c6sm02230h1.pdf]

## Supplementary Material for: Gaussian fluctuations of spatially inhomogeneous polymers

Yohai Bar-Sinai and Eran Bouchbinder  
*Chemical Physics Department, Weizmann Institute of Science, Rehovot 7610001, Israel*

This document is meant to provide additional technical details related to results reported on in the manuscript.

### I. FREE ENERGY IN THE CONTINUUM THEORY

Consider a general one-dimensional system whose energy is treated to quadratic order. The continuum energy takes the form

$$U^{\text{CT}}(w(x)) = \frac{1}{2} \langle w(x) | \mathfrak{L} | w(x) \rangle \equiv \frac{1}{2L} \int_0^L w(x) \mathfrak{L} w(x) dx ,$$

where  $\mathfrak{L}$  is a self-adjoint real differential operator. Our convention is that the eigenvalues of  $\mathfrak{L}$  are of energy dimensions, and thus  $w(x)$  is dimensionless. We work in the eigenbasis of  $\mathfrak{L}$ , which we denote by  $w_{q_1}(x), \dots, w_{q_N}(x)$ . These functions are orthonormal, i.e.

$$\begin{aligned} \frac{1}{L} \int_0^L w_q w_{q'} dx &= \delta_{qq'} , \quad \text{and} \\ \langle w_q | \mathfrak{L} | w_{q'} \rangle &= \lambda_q \delta_{qq'} , \end{aligned} \quad (\text{S1})$$

where  $\lambda_q$  is the eigenvalue associated with  $w_q$ . The eigenmodes span the functional space and a general configuration  $w(x)$  can be written as  $w(x) = \sum_q a_q w_q(x)$  where  $a_q \equiv \langle w(x) | w_q \rangle$ . The energy is thus written as  $U^{\text{CT}} = \frac{1}{2} \sum_q \lambda_q a_q^2$ , and the partition function, defined in Eq. (26) of the main text, reads

$$\begin{aligned} Z^{\text{CT}} &= \int Dw e^{-\beta \langle w | \mathfrak{L} | w \rangle} \Theta(\varepsilon - w(L)) \\ &= \int d^N a_q \exp \left[ -\beta \sum_q \frac{1}{2} \lambda_q a_q^2 \right] \Theta\left(\varepsilon - \sum_q a_q w_q(L)\right) . \end{aligned} \quad (\text{S2})$$

This is a multivariate Gaussian integral over a half-space. In Sec. IV of this file we derive a general formula for integrals of this type (Eq. (S25)). Applying this formula to Eq. (S2) yields

$$Z^{\text{CT}} = \frac{1}{2} \left( \frac{(2\pi)^N}{\beta^N \det \mathfrak{L}} \right)^{1/2} \left( 1 + \text{erf} \left[ \varepsilon \sqrt{\frac{\beta \kappa_h}{\ell^{\text{CT}}}} \right] \right) \quad (\text{S3})$$

$$\ell^{\text{CT}} \equiv 2L \sum_q \left( \frac{w_q(L)}{qL} \right)^2 . \quad (\text{S4})$$

where  $\text{erf}(\cdot)$  is the standard error function and the relation  $\lambda_q = \kappa_h L q^2$  was used.  $\det \mathfrak{L}$  is defined as  $\prod_q \lambda_q$ . The

factor  $\frac{1}{2}(2\pi)^{N/2}$  is of no physical importance and will be omitted in what follows.

Note that here we take into account exactly  $N$  continuum modes, which is basically a choice of an ultraviolet cutoff on  $q$ . The results presented here do not depend qualitatively on the choice of the ultraviolet cutoff, as long as the number of modes scales with  $N$ , which is anyway a trivial requirement from any reasonable cutoff scheme.

The free energy is thus given by

$$\begin{aligned} F^{\text{CT}} &\equiv -k_B T \log Z^{\text{CT}} = F_{\text{uc}}^{\text{CT}} + F_{\varepsilon}^{\text{CT}} , \\ F_{\text{uc}}^{\text{CT}} &\equiv \frac{1}{2} k_B T \log (\beta^N \det \mathfrak{L}) , \\ F_{\varepsilon}^{\text{CT}} &\equiv -\frac{1}{2} k_B T \log \left( 1 + \text{erf} \left[ \varepsilon \sqrt{\frac{\beta \kappa_h}{\ell^{\text{CT}}}} \right] \right) . \end{aligned} \quad (\text{S5})$$

We now turn to calculate  $\det \mathfrak{L}$ , which is done by explicit calculation of the eigenmodes. Since the wavenumbers are given approximately by Eqs. (19)-(20) of the main text, the calculation of  $F^{\text{CT}}$  is straightforward. The eigenvalue associated with the wavenumber  $q$  is  $\lambda_q = L \kappa_h q^2$  and thus

$$\det \mathfrak{L} = \prod_q \lambda_q = \prod_n \kappa_h L q_n^2 = \left( \frac{\kappa_h}{L} \right)^N C^{2N} (N!)^2 .$$

This immediately leads to

$$\begin{aligned} F^{\text{CT}} &= \frac{1}{2} k_B T \log [\beta^N \det \mathfrak{L}] = \\ &= N k_B T \left[ \frac{1}{2} \log \left( \frac{\beta \kappa_h}{L} \right) - \log \left( \frac{\phi \Delta + 1 - \phi}{\pi} \right) + \frac{1}{N} \log N! \right] . \end{aligned} \quad (\text{S6})$$

We now apply Stirling's approximation, which we write as  $\log(N!) \approx N \log \left( \frac{N}{e} \right)$  and after some rearrangement we obtain

$$\begin{aligned} F^{\text{CT}} &\approx N k_B T \left[ \frac{1}{2} \log \left( \frac{\beta \kappa_h}{L/N} \right) \right. \\ &\quad \left. - \log (\Delta \phi + 1 - \phi) + \log \left( \sqrt{N} \frac{\pi}{e} \right) \right] . \end{aligned} \quad (\text{S7})$$

The free energy of a homogeneous polymer,  $f^{\text{CT}}$  is immediately obtained by setting  $\phi = 0$ .

### II. FREE ENERGY IN THE DISCRETE THEORY

Here we present the calculation of the free energy associated with  $\mathbf{H}^{(1)}$  in the discrete formalism. We want

to calculate the partition function

$$Z^{\text{DT}} = \int_{-\infty}^{\infty} d^N \mathbf{w} e^{-\beta U^{\text{DT}}(\mathbf{w})} \Theta(\varepsilon - w_N) , \quad (\text{S8})$$

with

$$U^{\text{DT}}(\mathbf{w}) = \sum_{i=1}^N \frac{1}{2} \kappa_i \left( \frac{w_i - w_{i-1}}{\Delta x} \right)^2 \Delta x . \quad (\text{S9})$$

Unlike the continuum case described in the previous section, here the calculation can be performed without explicit reference to the eigenmodes. The trick is to use the non-orthogonal change of variables

$$y_i \equiv \sqrt{\frac{\kappa_i}{\Delta x}} (w_i - w_{i-1}) , \quad w_i = \sum_{j=1}^i y_j \sqrt{\frac{\Delta x}{\kappa_j}} . \quad (\text{S10})$$

The Jacobian of this transformation is  $\prod_i \sqrt{\frac{\kappa_i}{\Delta x}} = \sqrt{\det \mathbf{H}}$ . With the new variables  $y_i$  the energy takes the simple form  $U = \frac{1}{2} \|\mathbf{y}\|^2$ . The partition function is thus

$$Z^{\text{DT}} = \sqrt{\frac{1}{\det \mathbf{H}}} \int_{-\infty}^{\infty} d^N \mathbf{y} e^{-\frac{\beta}{2} \|\mathbf{y}\|^2} \Theta \left( \varepsilon - \sum_j y_j \sqrt{\frac{\Delta x}{\kappa_j}} \right) .$$

This is a Gaussian integral over a half-space, for which we derive an explicit formula in Sec. IV of this file (Eq. (S25)). The result is

$$Z^{\text{DT}} = \frac{1}{2} \sqrt{\frac{(2\pi)^N}{\beta^N \det \mathbf{H}}} \left( 1 + \text{erf} \left[ \varepsilon \sqrt{\frac{\beta \kappa_{\text{eff}}}{2\Delta x}} \right] \right) , \quad (\text{S11})$$

where we introduced the notation  $\kappa_{\text{eff}} \equiv (\sum \kappa_i^{-1})^{-1}$ , i.e. the effective spring constant of the chain.

Note that this expression holds for an arbitrary choice of  $\kappa_i$ , and also that it is invariant to permutations in the order of the  $\kappa_i$ 's (since  $\det \mathbf{H}$  is). If we assume  $\kappa(x)$  has the form described in the main text, i.e.  $N\phi$  springs have a spring constant of  $\kappa_s$  and  $N(1-\phi)$  have a spring constant of  $\kappa_h$ , we have

$$\kappa_{\text{eff}} = \left( \frac{N\phi}{\kappa_s} + \frac{N(1-\phi)}{\kappa_h} \right)^{-1} = \frac{\kappa_h/N}{\Delta^2 \phi + (1-\phi)} , \quad (\text{S12})$$

$$\det \mathbf{H} = \prod_i \frac{\kappa_i}{\Delta x} = \left( \frac{\kappa_h}{\Delta x} \right)^N \Delta^{-2N\phi} . \quad (\text{S13})$$

Thus, the free energy is

$$\begin{aligned} F^{\text{DT}} &\equiv -k_B T \log Z^{\text{DT}} = F_i^{\text{DT}} + F_\varepsilon^{\text{DT}} , \\ F_{\text{uc}}^{\text{DT}} &\equiv \frac{1}{2} k_B T \log (\beta^N \det \mathbf{H}) \\ &= \frac{N}{2} k_B T \left[ \log \left( \frac{\beta \kappa_h}{L/N} \right) - \phi \log \Delta \right] , \end{aligned} \quad (\text{S14})$$

$$\begin{aligned} F_\varepsilon^{\text{CT}} &\equiv -\frac{1}{2} k_B T \log \left( 1 + \text{erf} \left[ \varepsilon \sqrt{\frac{\beta \kappa_h}{\ell^{\text{DT}}}} \right] \right) , \\ \ell^{\text{DT}} &= 2L (\Delta^2 \phi + (1-\phi)) . \end{aligned} \quad (\text{S15})$$

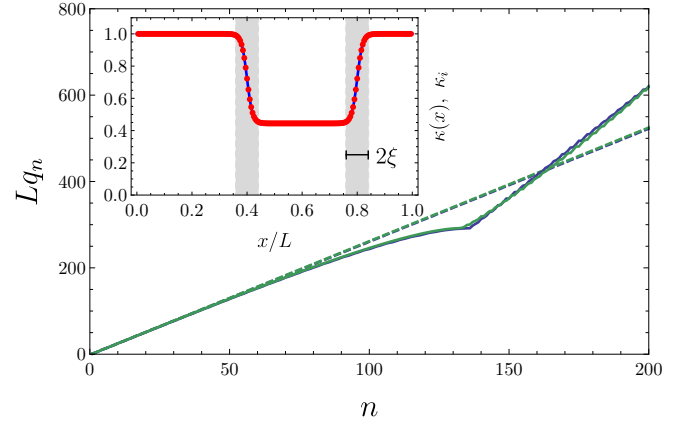

FIG. S1. The spectrum of the SFT operator (dashed lines) and the discrete operator (solid lines) for the case  $\xi = L/25$  (green) and  $\xi = 0$  (blue) which is discussed in the manuscript. Inset: The smoothed  $\kappa(x)$  (solid line) and the discrete  $\kappa_i$  (points). The parameters used are the same as those of Fig. 1 of the main text, together with  $\xi = L/25$ . The shaded regions, each of width  $2\xi$ , show the region where  $\kappa$  varies.

### III. SMOOTH VARIATION OF $\kappa(x)$

The continuum eigenmodes of a system with a smoothly varying  $\kappa(x)$  can be obtained using a straightforward shooting method. The Sturm-Liouville problem associated with  $\mathfrak{L}^{(1)}$ , namely

$$\frac{\partial}{\partial x} \left( \kappa(x) \frac{\partial w}{\partial x} \right) = \lambda w(x) \quad (\text{S16})$$

is interpreted as a differential equation which is integrated with the initial conditions  $w(0)=0$  and  $w'(0)=1$ . The equation is integrated up to  $x=L$  and the value  $w'(L; \lambda)$  is obtained as a function of  $\lambda$ . The eigenvalues are those  $\lambda$  for which  $w'(L; \lambda)=0$ . These are found using standard root-finding methods.

To explore the effect of the smoothness of  $\kappa(x)$  on the results, we chose a specific form of smoothing. Instead of a sharp step function, defined as

$$\Theta(x) = \begin{cases} 0 & x < 0 \\ 1 & x > 0 \end{cases} , \quad (\text{S17})$$

we use a hyperbolic tangent function that varies over a finite lengthscale  $\xi$

$$\Theta(x; \xi) = \frac{1}{2} \left[ 1 + \tanh \left( \frac{2x}{\xi} \right) \right] . \quad (\text{S18})$$

$\xi$  can be significantly larger than the monomeric lengthscale. Equation (S17) is recovered in the limit  $\xi \rightarrow 0$ . An example of a smoothed  $\kappa(x)$  with  $\xi = L/25$  is shown in Fig. S1. The computed spectra are also shown and it is seen that the effect of  $\xi$  on the spectrum is small and the qualitative discrepancies between the continuum and

discrete theories persist. Moreover, the qualitative discrepancies between the continuum and discrete theories are independent of  $\xi$ , at least as long as  $\xi \ll L$ .

#### IV. HALF-SPACE GAUSSIAN INTEGRALS

The partition function, defined in Eq. (26) of the main text, is a multivariate Gaussian integral over a half space. In this section we calculate such an integral in a general manner, to be used in calculations of  $Z^{\text{DT}}$  and  $Z^{\text{CT}}$ .

We want to calculate the integral

$$I(\mathbf{A}, \mathbf{v}) = \int_{-\infty}^{\infty} d^N \mathbf{x} e^{-\frac{1}{2} \mathbf{x}^T \mathbf{A} \mathbf{x}} \Theta(b - \mathbf{v} \cdot \mathbf{x}) . \quad (\text{S19})$$

That is, the integral of a multivariate Gaussian over the half space defined by  $\mathbf{v} \cdot \mathbf{x} < b$ .  $\mathbf{v}$  is an arbitrary real vector and  $\mathbf{A}$  is a strictly positive-definite symmetric matrix. We begin with the simpler case where  $\mathbf{A}$  is diagonal. The generalization for the non-diagonal case will be immediate. The integral is then

$$I(\mathbf{A}, \mathbf{v}) = \int_{-\infty}^{\infty} d^N \mathbf{x} e^{-\frac{1}{2} \sum_i \lambda_i x_i^2} \Theta(b - \mathbf{v} \cdot \mathbf{x}) ,$$

where the  $\lambda_i$ 's are the eigenvalues of  $\mathbf{A}$ . We replace the Heaviside function by the integral identity

$$\Theta(b-x) = \int_{-\infty}^b \delta(z-x) dz = \int_{-\infty}^b \frac{dz}{2\pi} \int_{-\infty}^{\infty} d\omega \exp[i\omega(z-x)] ,$$

where two auxiliary variables,  $\omega$  and  $z$ , were introduced. This identity holds for arbitrary  $x, b \in \mathbb{R}$ . With this replacement, after simple rearrangement the integral is written as

$$I = \int_{-\infty}^b \frac{dz}{2\pi} \int_{-\infty}^{\infty} e^{i\omega z} \times \left( \prod_{j=1}^N \int_{-\infty}^{\infty} dx_j \exp \left[ - \left( \frac{1}{2} \lambda_j x_j^2 + i\omega v_j x_j \right) \right] \right) d\omega . \quad (\text{S20})$$

This is a product of Gaussian integrals, for each of which we can use the integral identity

$$\int_{-\infty}^{\infty} \exp \left[ -\frac{1}{2} a z^2 \pm i\omega z \right] dz = \sqrt{\frac{2\pi}{a}} \exp \left[ -\frac{\omega^2}{2a} \right] , \quad (\text{S21})$$

which holds for any  $\omega \in \mathbb{C}$  and real  $a > 0$ . Thus,

$$\begin{aligned} I &= \int_{-\infty}^b \frac{dz}{2\pi} \int_{-\infty}^{\infty} d\omega e^{i\omega z} \prod_{i=1}^N \sqrt{\frac{2\pi}{\lambda_i}} \exp \left[ -\frac{\omega^2 v_i^2}{2\lambda_i} \right] \quad (\text{S22}) \\ &= \sqrt{\frac{(2\pi)^N}{\det \mathbf{A}}} \int_{-\infty}^b \frac{dz}{2\pi} \int_{-\infty}^{\infty} d\omega e^{-\frac{1}{2} \left( \sum_i \frac{v_i^2}{\lambda_i} \right) \omega^2 + i\omega b} . \end{aligned}$$

The latter is again a Gaussian integral of the form of Eq. (S21), and denoting  $D \equiv \sum_i \frac{v_i^2}{\lambda_i} = \mathbf{v}^T \mathbf{A}^{-1} \mathbf{v}$  we get

$$I = \sqrt{\frac{(2\pi)^N}{\det \mathbf{A}}} \int_{-\infty}^b dz \sqrt{\frac{2\pi}{D}} \exp \left[ -\frac{z^2}{2D} \right] . \quad (\text{S23})$$

The last integral is expressed in terms of the standard error function

$$\text{erf}(z) \equiv \frac{2}{\sqrt{\pi}} \int_0^z e^{-x^2} dx , \quad (\text{S24})$$

such that

$$\begin{aligned} I(\mathbf{A}, \mathbf{v}) &= \frac{1}{2} \sqrt{\frac{(2\pi)^N}{\det \mathbf{A}}} \left[ 1 + \text{erf} \left( \frac{b}{\sqrt{2D}} \right) \right] , \quad (\text{S25}) \\ D &\equiv \mathbf{v}^T \mathbf{A}^{-1} \mathbf{v} . \end{aligned}$$

This completes the derivation. While this is not necessary for the present needs, we note that the formula (S25) is valid also when  $\mathbf{A}$  is not diagonal. This can be seen by a simple change of variables.
